# Supplementary material for: A stable and high-voltage-resistant inorganic/polymer double-layer electrolyte for LiCoO2-based all-solid-state Li batteries
Source: Royal Society of Chemistry journal article supplement (doi:10.1039/d3nj01954c), 2023-01-01
Supplement: d3nj01954c1.pdf [file d3nj01954c1.pdf]

## Supplementary Information

### A stable and high-voltage resistant inorganic/polymer double-layer electrolyte for LiCoO<sub>2</sub> based all-solid-state Li batteries

Yuqi Yang,<sup>a</sup> Hongyi Wang,<sup>a</sup> Yuanyuan Zhang,<sup>a</sup> Ying Wang<sup>c</sup> and Jingze Li<sup>ab\*</sup>

---

a. School of Materials and Energy, University of Electronic Science and Technology of China, Chengdu, 611731, P. R. China

b. Yangtze Delta Region Institute (Huzhou), University of Electronic Science and Technology of China, Huzhou, 313001, P. R. China

c. School of Mechanical and Automotive Engineering, Shanghai University of Engineering Science, Shanghai 201620, P. R. China

E-mail: lijingze@uestc.edu.cn

#### Experimental section

##### Fabricate LCO cathode :

800 mg LCO, 100 mg Super P and 100 mg PVDF were mixed and stirred 24 h in NMP to form a homogenized solution at 25 °C. The cathode was readily fabricated by spreading LCO slurry on carbon-coated Al surface using a doctor blade, then stored in a vacuum oven at 110 °C for 12 h and separated into small circles with a diameter of 15 mm.

##### Produce a LiPON layer on LCO surface :

The cathode was cleaned by high-purity Ar gas, then transferred to the vacuum chamber. When the background pressure of the chamber reached  $9.9 \times 10^{-4}$  Pa, high-purity N<sub>2</sub> gas at a flowing rate of 50 sccm was introduced to maintain the working pressure (1.0 Pa). Simultaneously, RF power supply with 120 W was applied to deposit the LiPON buffer layer.

##### Preparation of solid polymer electrolyte :

2000 mg PEO and 406 mg LiTFSI ( $\text{Li}^+$ : EO = 1:32) were dissolved in acetonitrile and a homogeneous solution was formed by stirring for 24 h at room temperature. Then, 900 mg succinonitrile was added into the homogeneous solution and still stirred for 12 h to form SPE solution. Finally, 2 mL SPE solution was cast onto the LiPON-coated LCO surface and dried in a vacuum oven at 60 °C for 12 h so as to remove the acetonitrile solvent.

## Supplementary Figures

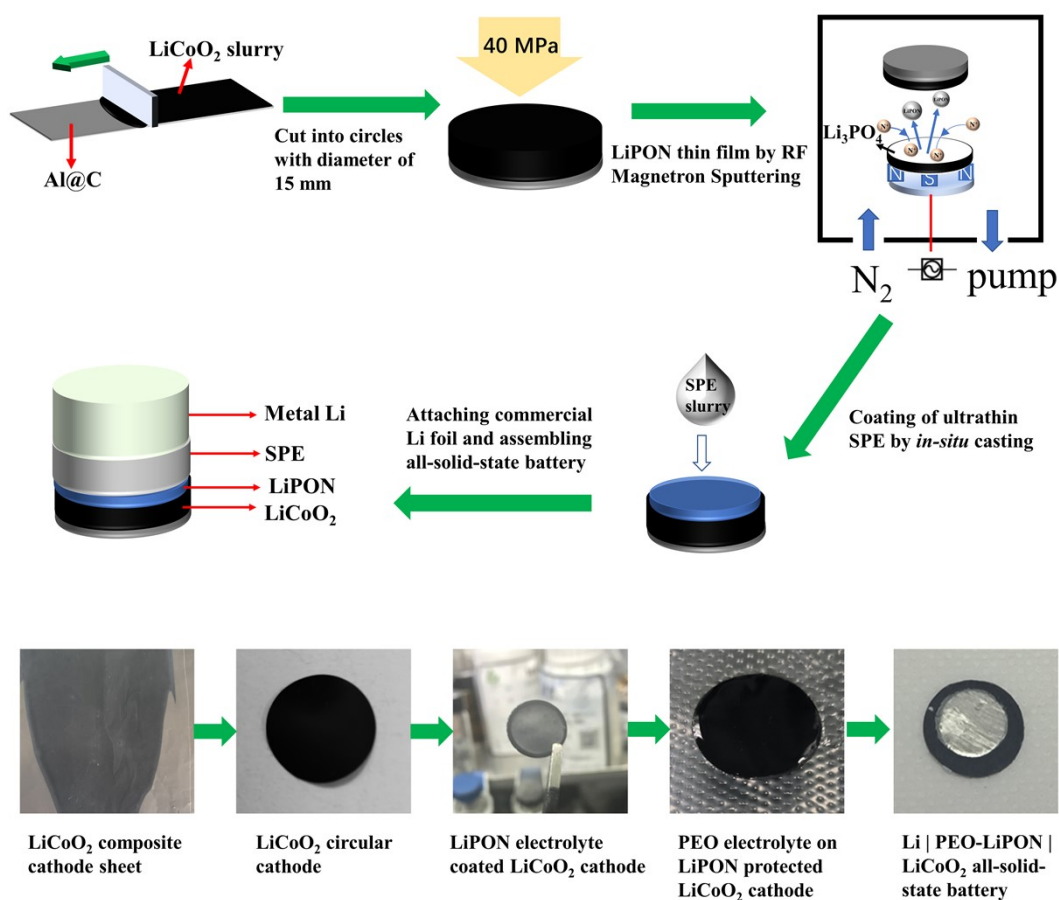

Figure S1 Schematic drawing of the experimental procedure and the corresponding optical image snapped at each stage.

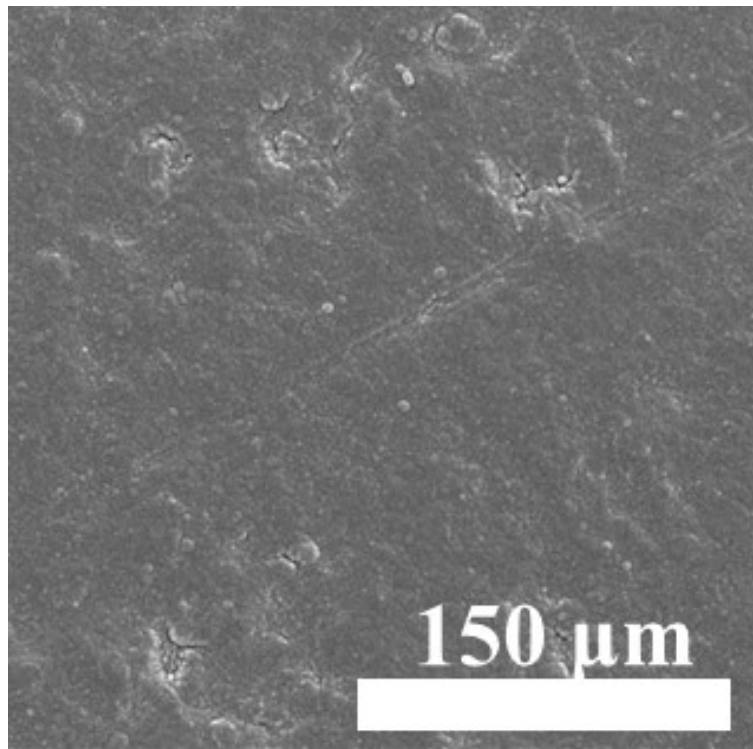

Figure S2 Top-view SEM image of LiPON

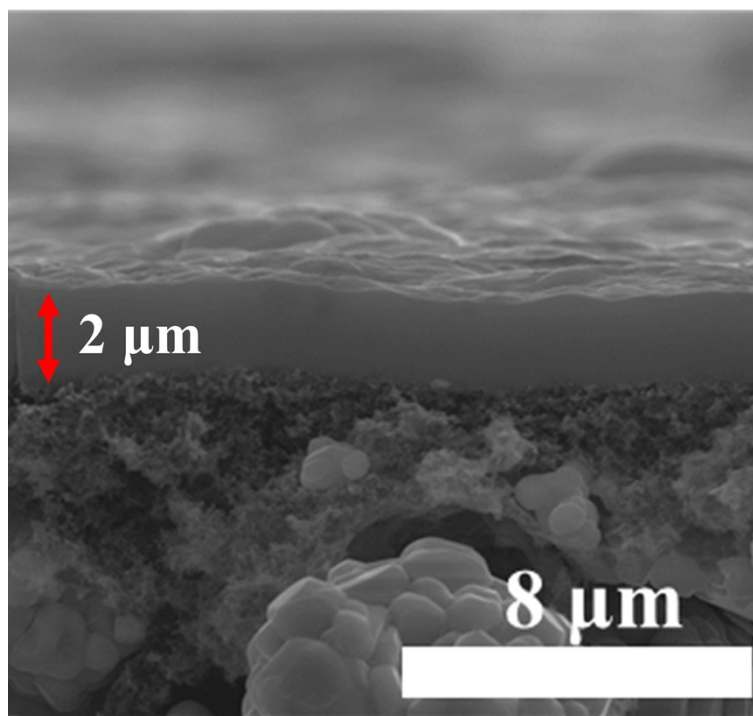

Figure S3 The zoom-in cross-sectional SEM image of 2 μm thick LiPON-coated LCO cathode.

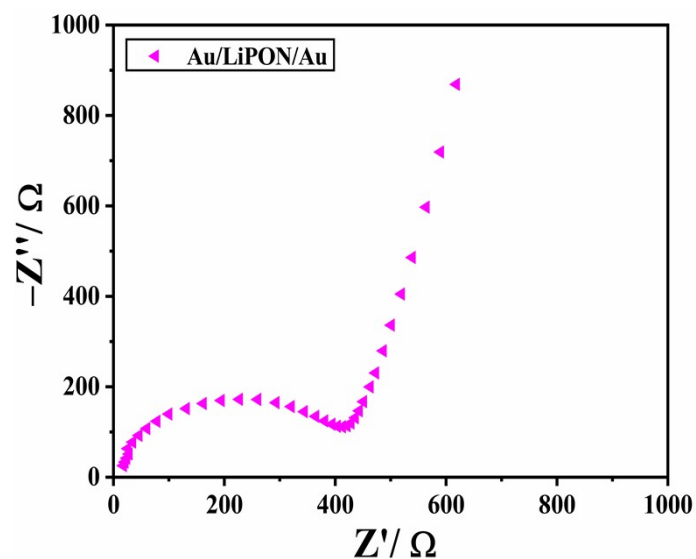

Figure S4 EIS measurements of Au|LiPON|Au.

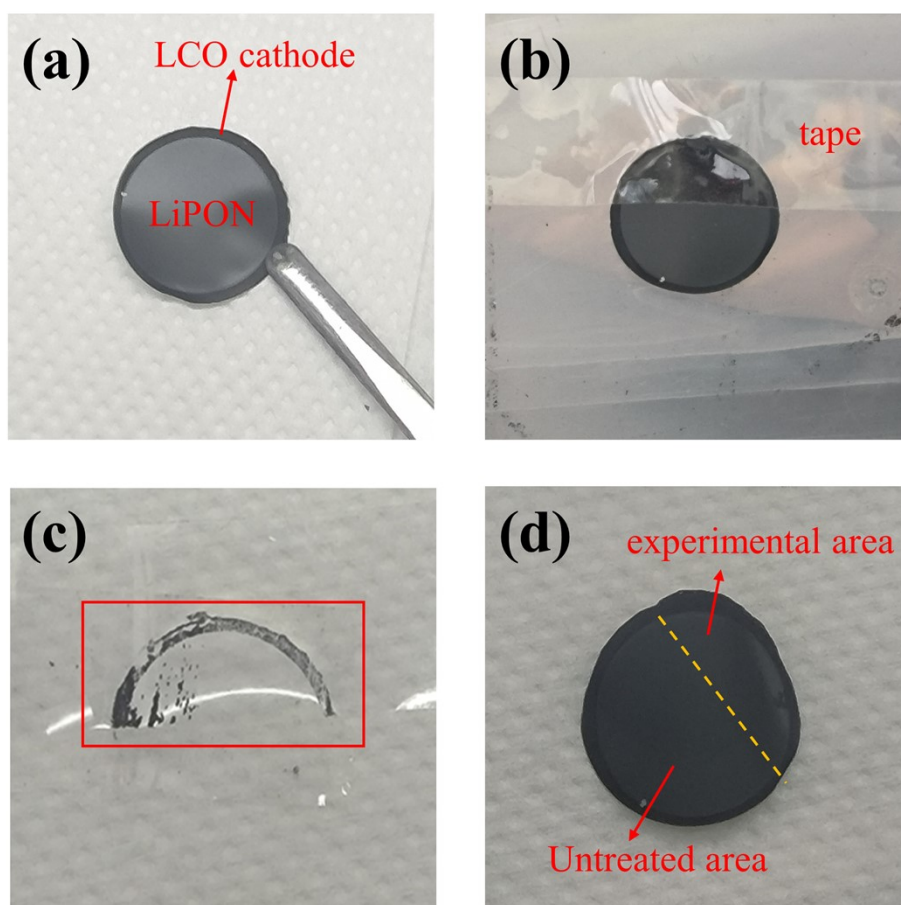

Figure S5 Optical photograph of (a) LiPON-coated LCO; (b) the half of LiPON-coated LCO is fixed with tape; (c) the peeled off tape; (d) the difference between experimental area and untreated area.

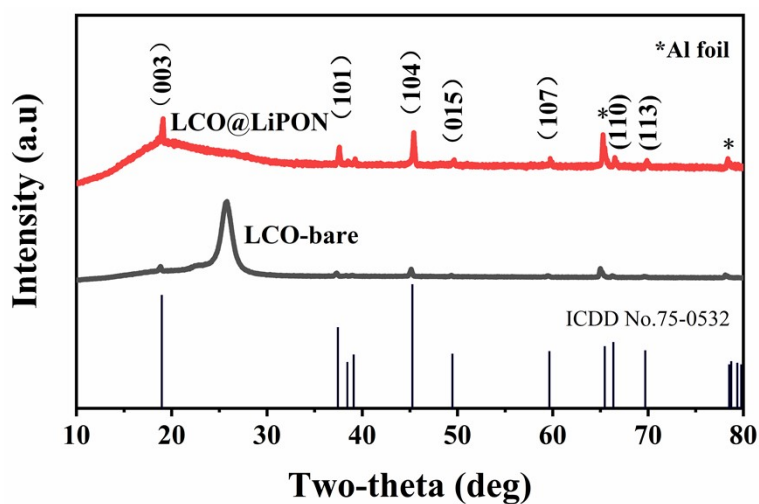

Figure S6 XRD patterns of LCO and LiPON-coated LCO.

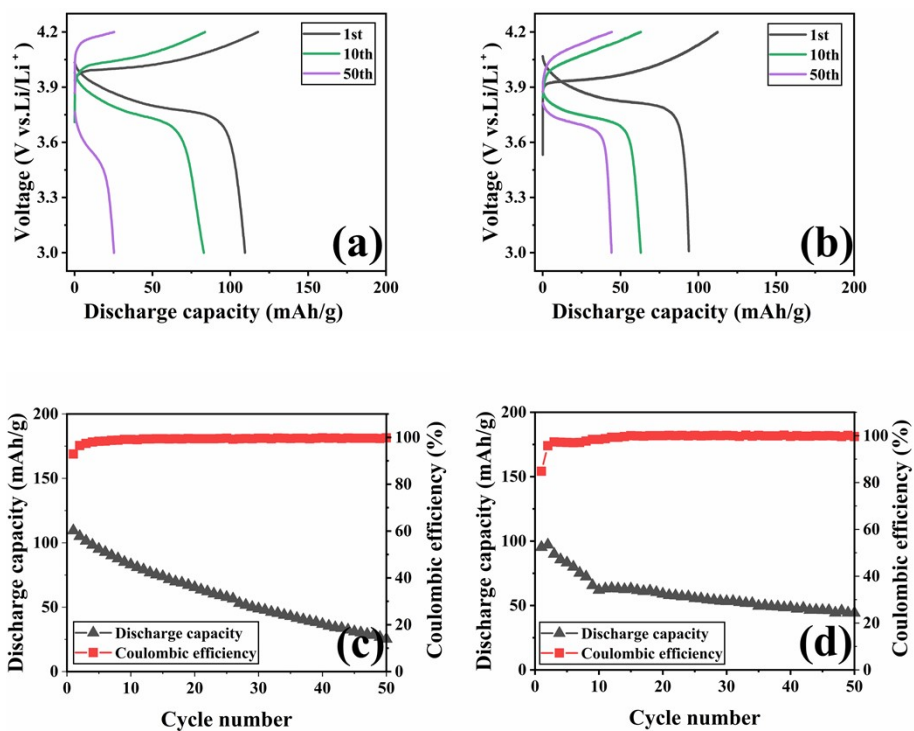

Figure S7 The charge and discharge curves at the 1st, 10th and 100th cycle under the cut-off voltage of 4.2 V (a) LCO|SPE50|Li and (b) LCO|SPE100|Li; the cyclic performances of (c) LCO|SPE50|Li and (d) LCO|SPE100|Li.

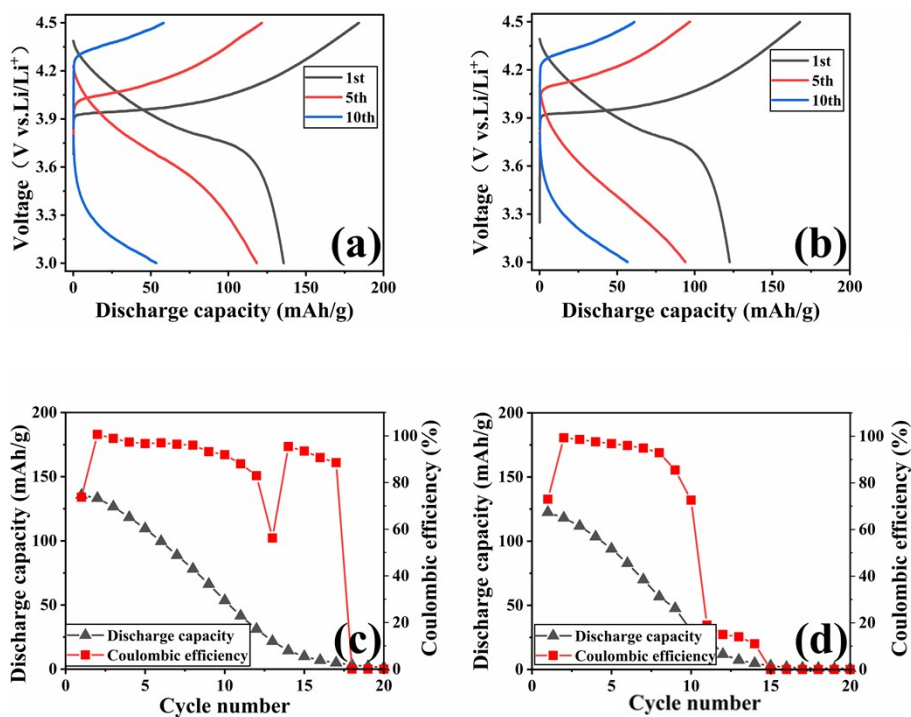

Figure S8 The charge and discharge curves at the 1st, 10th and 100th cycle under the cut-off voltage of 4.5 V (a) LCO|SPE50|Li and (b) LCO|SPE100|Li; the cyclic performances of (c) LCO|SPE50|Li and (d) LCO|SPE100|Li.

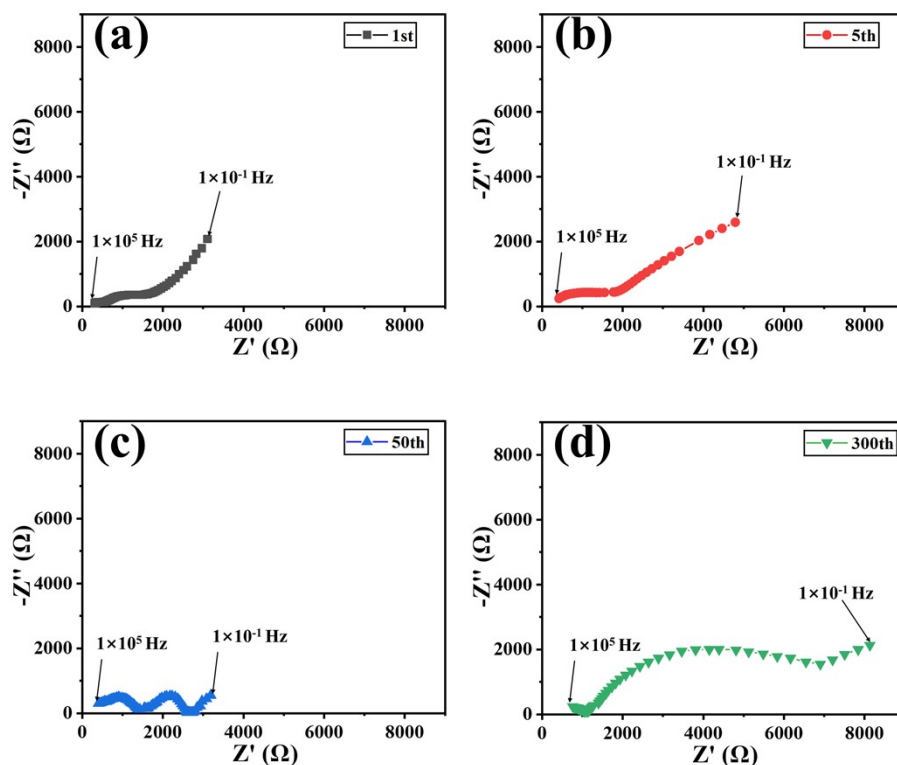

Figure S9 EIS data of LCO|LiPON-SPE|Li cell at (a) 1st; (b) 5th; (c) 50th; (d)300th.

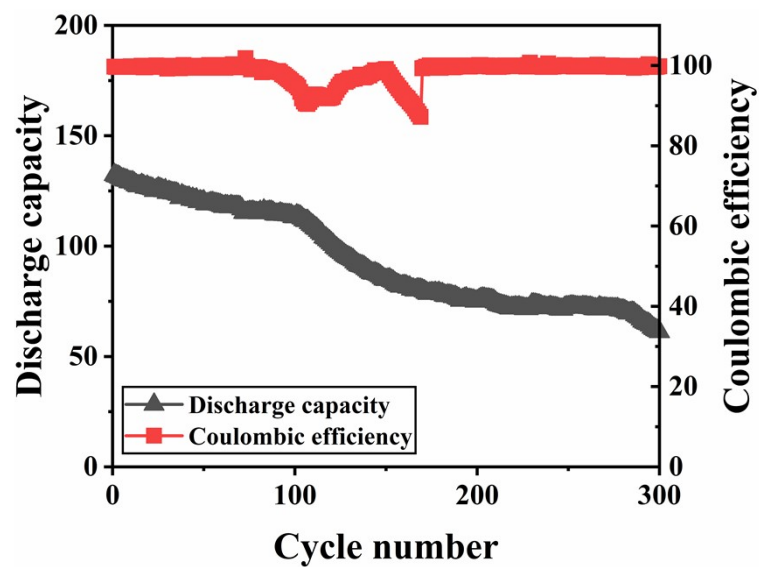

Figure S10 The long cyclic performance of LCO|LiPON-SPE|Li.
